# Supplementary material for: Expanding the 3d-4f heterometallic chemistry of the (py)2CO and pyCOpyCOpy ligands: structural, magnetic and Mössbauer spectroscopic studies of two FeII–GdIII co mplexes
Source: Royal Society of Chemistry journal article supplement (doi:10.1039/c1dt10237k), 2011-01-01
Supplement: c1dt10237k.pdf [file c1dt10237k.pdf]

## Supporting Information

The degree of distortion away from ideal geometries for the coordination polyhedra around the Fe atoms (Figures S1-S3) is estimated by the Muetterties-Guggenberger<sup>1</sup> and the Continuous Symmetry Measure<sup>2</sup> (CSM) methods. The results of those calculations are presented in Tables S1-S3. In Table S1 we compare the dihedral angles associated with each of the 12 edges of the coordination polyhedra of the Fe atoms in **1** and **2**. In Table S2 we present the Bailar-twist angles for each of these polyhedra and in Table S3 we present their symmetry measures  $S(G)$  according to the definition of Alvarez et al. [ $S(G) = 0$  corresponds to a polyhedron site of perfect  $G$  symmetry].

**Table S1** Coordination polyhedra edges for Fe atoms in **1** and **2** and associated dihedral angles as defined by Muetterties and Guggenberger.<sup>1</sup>

| 1: Fe       |                    | 2: Fe(1)    |                    | 2: Fe(2)    |                    |
|-------------|--------------------|-------------|--------------------|-------------|--------------------|
| Edge        | Dihedral angle (°) | Edge        | Dihedral angle (°) | Edge        | Dihedral angle (°) |
| N(31)-O(61) | 58.7               | N(61)-O(21) | 52.7               | N(2)-O(61)  | 39.92              |
| N(61)-O(1)  | 56.2               | N(22)-O(41) | 55.0               | N(62)-O(41) | 45.954             |
| N(1)-O(31)  | 58.1               | N(42)-O(61) | 42.4               | N(41)-O(1)  | 42.06              |
| O(61)-N(61) | 84.3               | O(61)-N(61) | 86.1               | N(2)-O(1)   | 93.403             |
| O(1)-N(1)   | 82.7               | O(21)-N(22) | 94.3               | N(41)-O(41) | 94.691             |
| O(31)-N(31) | 85.11              | O(41)-N(42) | 89.2               | N(62)-O(61) | 91.05              |
| N(1)-N(61)  | 76.5               | O(61)-O(21) | 77.7               | O(1)-O(61)  | 77.91              |
| N(61)-N(31) | 73.44              | O(41)-O(21) | 50.6               | O(41)-O(1)  | 66.22              |
| N(1)-N(31)  | 75.44              | O(41)-O(61) | 81.5               | O(61)-O(41) | 70.58              |
| O(1)-O(61)  | 66.18              | N(61)-N(42) | 80.3               | N(62)-N(41) | 73.455             |
| O(31)-O(1)  | 65.27              | N(61)-N(22) | 63.3               | N(2)-N(62)  | 77.394             |

O(61)-O(31) 66.72      N(22)-N(42) 82.3      N(2)-N(41) 84.373

---

**Table S2** Bailar-twist angles for the coordination polyhedra of the Fe atoms in **1** and **2**.<sup>1</sup>

|                  | Bailar-twist angles (°) |
|------------------|-------------------------|
| <b>1</b> : Fe    | 43 <sup>a</sup>         |
| <b>2</b> : Fe(1) | 33, 34, 43              |
| <b>2</b> : Fe(2) | 28, 32, 32              |

<sup>a</sup>Individual values are very close. Only the average value is given

**Table S3** Symmetry measures  $S(G)$  for the coordination polyhedra of the Fe atoms in **1** and **2**, according to the definitions of Alvarez et al.<sup>2</sup>

|          | <b>1</b> : Fe | <b>2</b> : Fe(1) | <b>2</b> : Fe(2) |
|----------|---------------|------------------|------------------|
| $S(O_h)$ | 2.095         | 4.285            | 4.828            |
| $S(itp)$ | 11.173        | 9.015            | 6.026            |

Based on the above, the values of dihedral angles defined by Muetterties and Guggenberger are quite dispersed between the values corresponding to ideal  $O_h$  ( $70.5^\circ$  for all edges) and ideal trigonal prismatic (itp, 0, 90 and  $120^\circ$  for the three types of edges) geometries, suggesting intermediate geometries for all Fe atoms. Similarly, the Bailar-twist angles are intermediate between those that correspond to ideal  $O_h$  ( $60^\circ$ ) and itp ( $0^\circ$ ) geometries. In the case for **2**, these angles also exhibit a significant distribution.

On the other hand, the  $S(G)$  value for the Fe atom in **1** suggests a polyhedron closer to trigonally distorted  $O_h$  than to itp geometry. However, this measure is less discerning for the Fe atoms in **2**. In particular for Fe(2), the results are controversial;  $S(O_h) = 4.8 (> 4.42)$  indicates a distorted trigonal prism, whereas  $S(itp) = 5.3 (> 4.42)$  indicates a distorted octahedron.

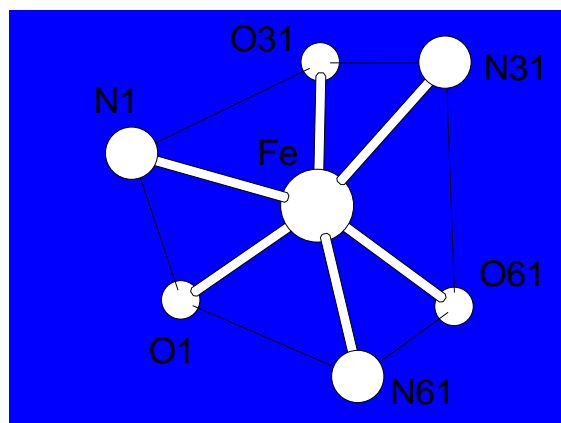

**Fig. S1** Coordination polyhedron of Fe in **1**.

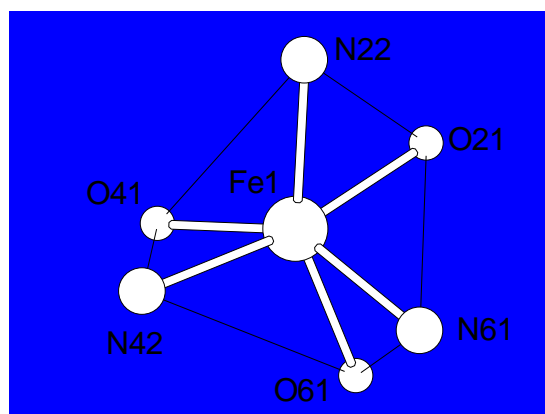

**Fig. S2** Coordination polyhedron of Fe(1) in **2**.

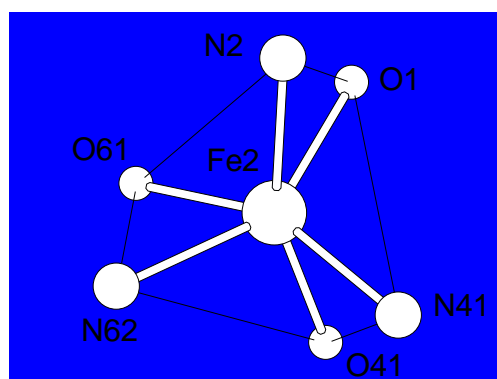

**Fig. S3** Coordination polyhedron of Fe(2) in **2**.

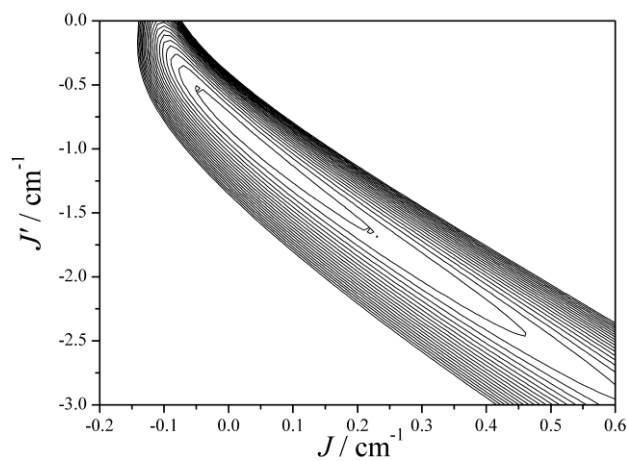

**Fig. S4** Error contour-plot of  $J$  vs  $J'$  ( $g = 1.98$ ) for the magnetic data of complex **2**, confirming the uniqueness of the best-fit solution described in the text.

---

<sup>1</sup> E. L. Muetterties and L. J. Guggenberger, *J. Am. Chem. S.* 1974, **96**, 1748.

<sup>2</sup> S. Alvarez, D. Anvir, M. Lulunell and M. Pinsky, *New J. Chem.* 2002, **26**, 996. We have used the internet interactive version of the SHAPE program (<http://telem.openu.ac.il/csm-calc/>)
